# Supplementary material for: Thymoquinone: An IRAK1 inhibitor with in vivo and in vitro anti-inflammatory activities
Source: PubMed Central journal article supplement (PMC5316937; doi:10.1038/srep42995), 2017-02-20
Supplement: srep42995-s1.pdf [file srep42995-s1.pdf]

## **Thymoquinone: an IRAK1 inhibitor with *in vivo* and *in vitro* anti-inflammatory activities**

Muhammad Jahangir Hossen<sup>1,2,a</sup>, Woo Seok Yang<sup>1,a</sup>, Daewon Kim<sup>3</sup>, Adithan Aravinthan<sup>3</sup>

Jong-Hoon Kim<sup>3,\*\*</sup>, Jae Youl Cho<sup>1,\*</sup>

<sup>1</sup>Department of Genetic Engineering, Sungkyunkwan University, Suwon 16419, Republic of Korea. <sup>2</sup>Department of Animal Science, Patuakhali Science and Technology University, Dumki, Patuakhali 8602, Bangladesh. <sup>3</sup>Laboratory of Bio-informatics, Department of Multimedia Engineering, Dankook University, Cheonan 31116, Republic of Korea. <sup>a</sup>These authors contributed equally to this work. Correspondence and requests for materials should be addressed to J.Y.C. ([jaecho@skku.edu](mailto:jaecho@skku.edu)) or D.K. ([dr\\_dwkim@dankook.ac.kr](mailto:dr_dwkim@dankook.ac.kr))

### **1. The cropping lines of gels/blots**

Selected data were shown in our manuscript and the PVDF membranes for Western Blot were cut into strips to minimize the amount of antibodies that are necessary for analysis.
